# Supplementary material
Source: publisher figshare collection journal article supplement (https://tandf.figshare.com/ndownloader/files/12313598)
Supplement: Supplementary file 1 [file 12313598]

| No | Type of  poultry | Country of origin | Enrofloxacin (ng/kg) | Ciprofloxacin (ng/kg) |
| --- | --- | --- | --- | --- |
| 1 | chicken | Estonia | < 1 | < 10 |
| 2 | chicken | Estonia | 3.6 | < 10 |
| 3 | chicken | Estonia | 63 | < 10 |
| 4 | chicken | Estonia | 4.6 | < 10 |
| 5 | chicken | Estonia | 3.3 | < 10 |
| 6 | chicken | Estonia | 64 | < 10 |
| 7 | chicken | Lithuania | 1126 | 95 |
| 8 | chicken | Lithuania | 124 | < 10 |
| 9 | chicken | Lithuania | 70 | < 10 |
| 10 | turkey | Lithuania | 310 | 27 |
| 11 | chicken | Lithuania | 473 | 42 |
| 12 | chicken | Lithuania | 66 | < 10 |
| 13 | chicken | Lithuania | 44 | < 10 |
| 14 | chicken | Lithuania | 297 | 27 |
| 15 | chicken | Lithuania | 8.4 | < 10 |
| 16 | chicken | Lithuania | 22 | < 10 |
| 17 | chicken | Lithuania | 52 | < 10 |
| 18 | chicken | Lithuania | 3.9 | < 10 |
| 19 | chicken | Lithuania | 52 | < 10 |
| 20 | chicken | Latvia | 18 | < 10 |
| 21 | chicken | Latvia | 116 | 13 |
| 22 | chicken | Latvia | 27 | < 10 |
| 23 | chicken | Latvia | 6.0 | < 10 |
| 24 | chicken | Latvia | 123 | 12 |
| 25 | chicken | Latvia | 45 | < 10 |
| 26 | turkey | Latvia | < 1 | < 10 |
| 27 | chicken | Latvia | 634 | 71 |
| 28 | turkey | Latvia | < 1 | < 10 |
| 29 | chicken | Latvia | 22 | < 10 |
| 30 | chicken | Latvia | 54 | < 10 |
| 31 | chicken | Latvia | 3.7 | < 10 |
| 32 | chicken | Latvia | 3.5 | < 10 |
| 33 | chicken | Latvia | 72 | < 10 |
| 334 | chicken | Latvia | 43 | < 10 |
| 35 | chicken | Latvia | 69 | < 10 |
| 36 | chicken | Latvia | 82 | < 10 |
| 37 | chicken | Latvia | 99 | < 10 |
| 38 | chicken | Poland | 480 | 37 |
| 39 | chicken | Poland | 72 | < 10 |
| 40 | chicken | France | 551 | 49 |
